# Supplementary material
Source: ML conference proceedings conference paper supplement (https://openreview.net/forum?id=iFIjNXb0Y5)

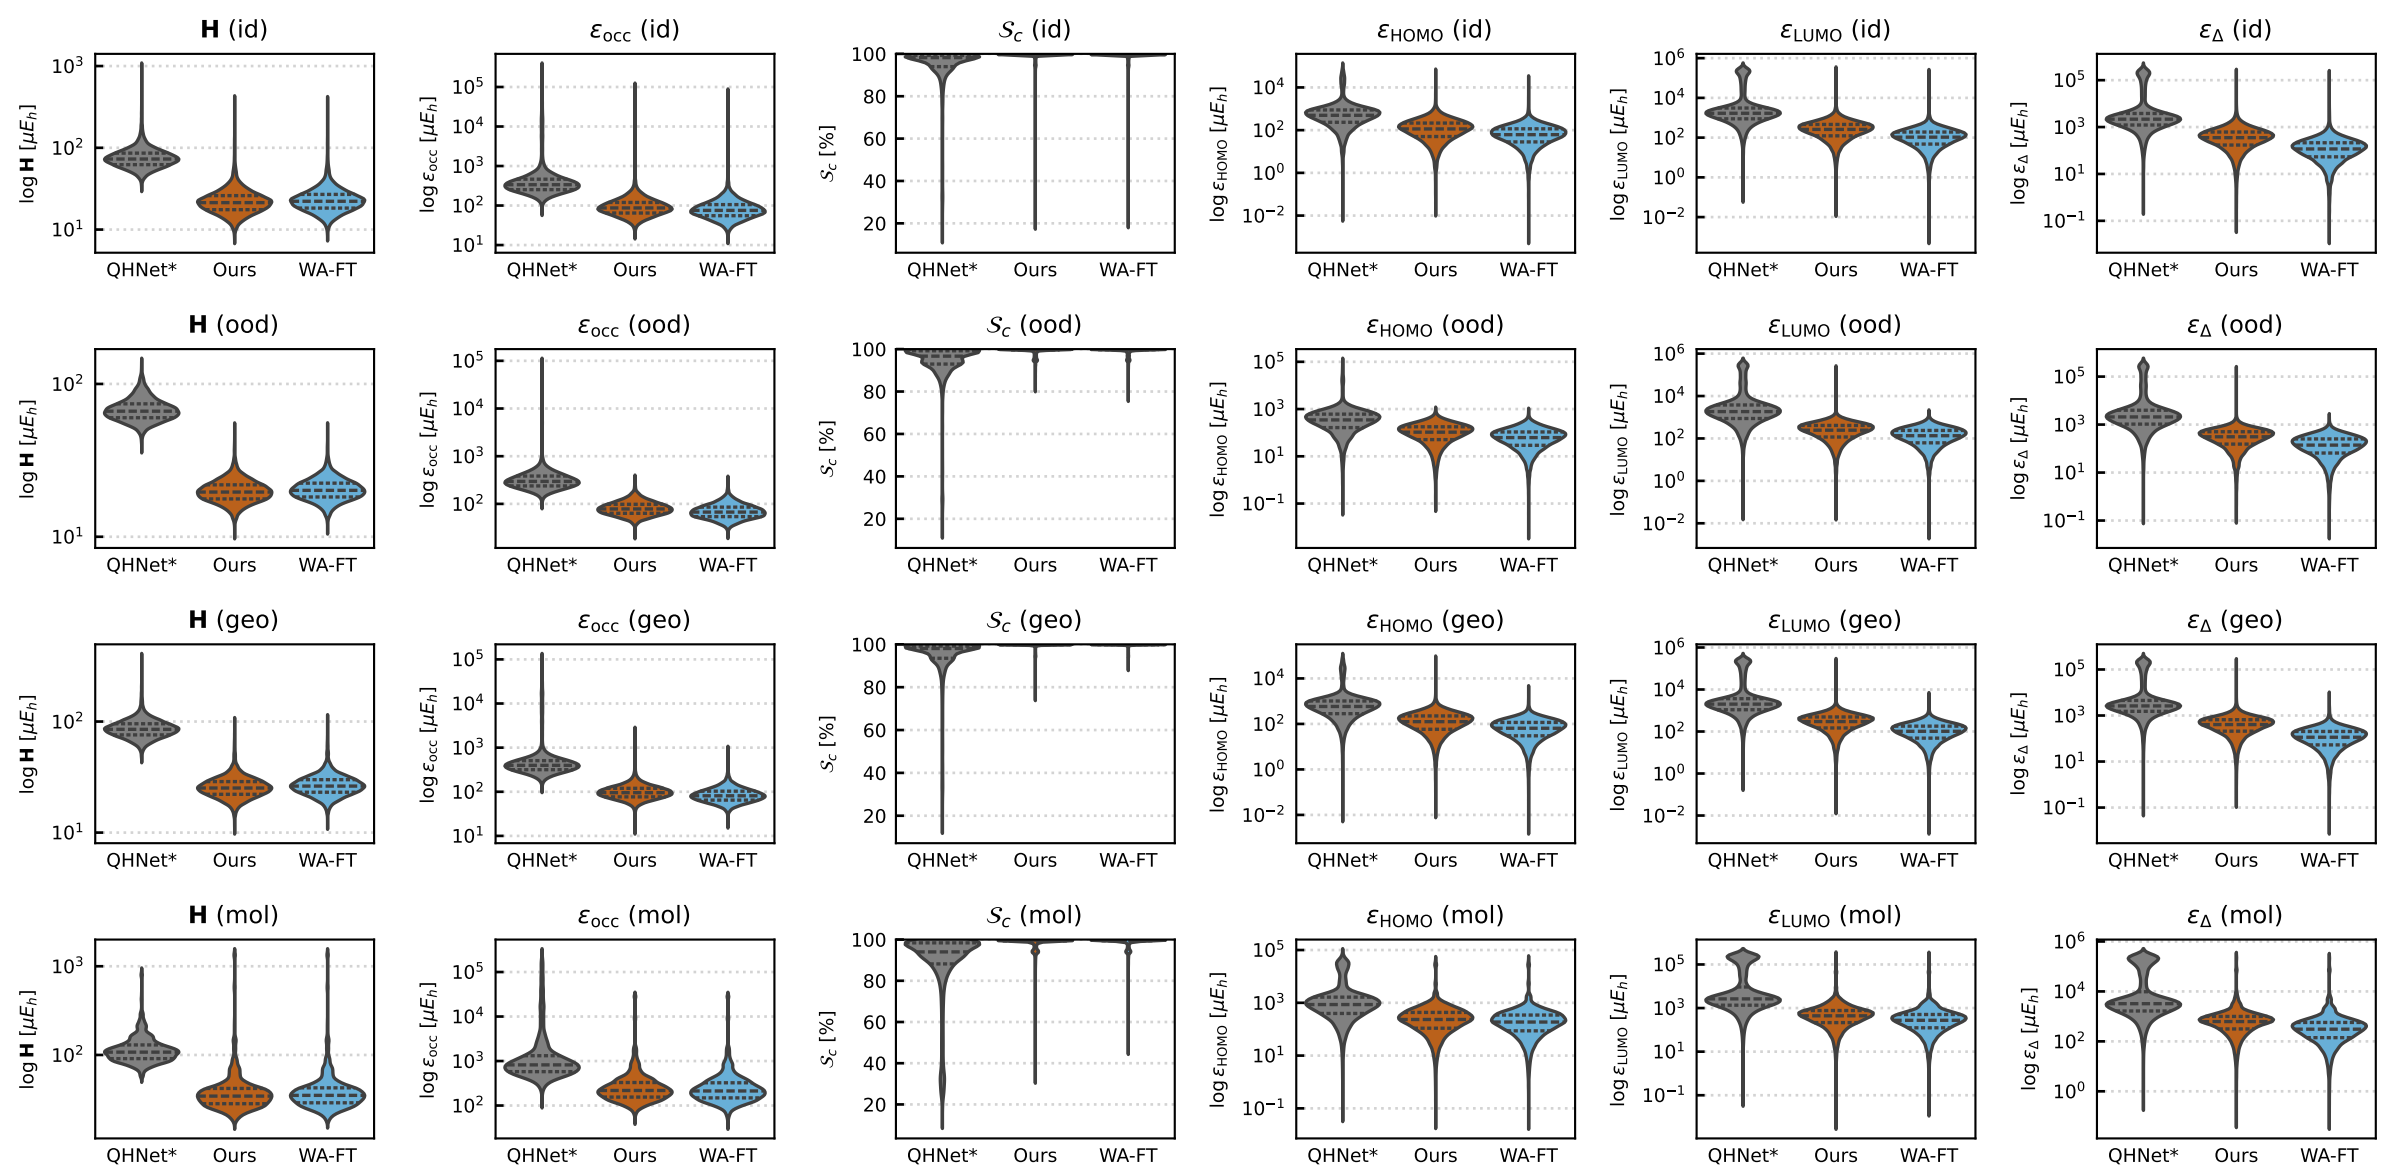

Supplement: supplementary_material [file Figure6.pdf › supplementary/Figure6.pdf]
